# Supplementary material
Source: PubMed Central journal article supplement (PMC2483467)
Supplement: NIHMS57512-supplement-1.pdf [file NIHMS57512-supplement-1.pdf]

**Supporting Online Material**

Supplemental Tables 1–5

**Supplemental Table 1.** Number of SNPs in the 16 genes evaluated for association with gene methylation.

| Gene    | No. of SNPs* |
|---------|--------------|
| ATM     | 8            |
| ATR     | 10           |
| Artemis | 19           |
| CHEK1   | 14           |
| CHEK2   | 12           |
| Ku70    | 6            |
| Ku80    | 25           |
| LIG4    | 11           |
| MRE11   | 14           |
| NBN†    | 42           |
| PRKDC   | 12           |
| RAD50   | 10           |
| TP53    | 8            |
| XRCC2   | 18           |
| XRCC3   | 16           |
| XRCC4   | 27           |
| total   | 252          |

\* Tag SNPs were selected by pairwise  $r^2$  method by using Phase I HapMap data for whites and Latino and White data from USC.

† SNPs were selected for NBN using dbSNPs based on the haplotype block structures and the validation status, Illumina design score, and functional potential of SNPs.

**Supplemental Table 2.** Prevalence of gene promoter methylation in sputum from 824 cohort members.

| <b>Gene</b>                       | <b>% Positive</b> |
|-----------------------------------|-------------------|
| p16                               | 17.0              |
| MGMT                              | 22.9              |
| RASSF1A                           | 1.2               |
| DAPK                              | 16.3              |
| GATA 4                            | 31.2              |
| GATA 5                            | 19.9              |
| PAX5 $\alpha$                     | 18.7              |
| PAX5 $\beta$                      | 10.8              |
| <b>Number of Genes Methylated</b> |                   |
| 0                                 | 32.5              |
| 1                                 | 28.6              |
| 2                                 | 19.8              |
| 3                                 | 10.3              |
| 4                                 | 5.7               |
| 5                                 | 2.2               |
| 6                                 | 0.8               |

**Supplemental Table 3.** Chromatid break per cell induced by bleomycin between cases and controls stratified by covariates.

| Variables                    | Case subjects |               | Control subjects |               | P-value* |
|------------------------------|---------------|---------------|------------------|---------------|----------|
|                              | n             | Mean ± SD     | n                | Mean ± SD     |          |
| Total                        | 77            | 0.473 ± 0.110 | 78               | 0.318 ± 0.098 | < 0.0001 |
| Age at sputum collection, yr |               |               |                  |               |          |
| < 51                         | 17            | 0.434 ± 0.061 | 30               | 0.293 ± 0.098 | < 0.0001 |
| 51–63                        | 26            | 0.465 ± 0.103 | 32               | 0.335 ± 0.095 | < 0.0001 |
| ≥ 63                         | 34            | 0.499 ± 0.129 | 16               | 0.329 ± 0.099 | < 0.0001 |
| P-value†                     |               | 0.0351        |                  | 0.0270        |          |
| Gender                       |               |               |                  |               |          |
| Female                       | 48            | 0.482 ± 0.125 | 48               | 0.318 ± 0.088 | < 0.0001 |
| Male                         | 29            | 0.460 ± 0.081 | 30               | 0.316 ± 0.114 | < 0.0001 |
| P-value†                     |               | 0.3690        |                  | 0.8484        |          |
| Race                         |               |               |                  |               |          |
| Non-Hispanic White           | 57            | 0.480 ± 0.119 | 57               | 0.311 ± 0.097 | < 0.0001 |
| Hispanic                     | 13            | 0.447 ± 0.040 | 17               | 0.349 ± 0.104 | 0.0017   |
| Others                       | 7             | 0.473 ± 0.125 | 4                | 0.274 ± 0.062 | 0.0167   |
| P-value†                     |               | 0.6700        |                  | 0.4187        |          |
| Current smoker               |               |               |                  |               |          |
| Yes                          | 36            | 0.474 ± 0.115 | 49               | 0.316 ± 0.093 | < 0.0001 |
| No                           | 41            | 0.473 ± 0.107 | 29               | 0.320 ± 0.107 | < 0.0001 |
| P-value†                     |               | 0.3526        |                  | 0.0694        |          |
| Pack years                   |               |               |                  |               |          |
| < 33.2                       | 38            | 0.468 ± 0.126 | 37               | 0.315 ± 0.081 | < 0.0001 |
| ≥ 33.2                       | 39            | 0.478 ± 0.094 | 41               | 0.320 ± 0.112 | < 0.0001 |
| P-value†                     |               | 0.9862        |                  | 0.7088        |          |
| Smoking duration, yr         |               |               |                  |               |          |
| < 34                         | 38            | 0.465 ± 0.106 | 40               | 0.306 ± 0.089 | < 0.0001 |
| ≥ 34                         | 39            | 0.482 ± 0.117 | 38               | 0.330 ± 0.106 | < 0.0001 |
| P-value†                     |               | 0.8654        |                  | 0.3242        |          |
| Chronic airway obstruction   |               |               |                  |               |          |
| Yes                          | 28            | 0.489 ± 0.099 | 20               | 0.323 ± 0.089 | < 0.0001 |
| No                           | 49            | 0.464 ± 0.116 | 56               | 0.319 ± 0.102 | < 0.0001 |
| P-value†                     |               | 0.4465        |                  | 0.7346        |          |

\* Two-sided two sample *t* test between cases and controls.

† Multivariate analysis of covariance with adjustment for age at sputum collection, sex, race, current smoking status, pack years, seeding number of lymphocytes, cryopreservation time, and log-transformed spontaneous chromatid breaks/cell.

**Supplemental Table 4.** Individual SNPs associated with risk for promoter methylation at  $p$  values  $\leq 0.15$  for the 16 genes evaluated in this study.

| rs num*                  | Chr   | Gene†   | Allele | MAF  | <i>P</i> -value | ORs  | low  | high |
|--------------------------|-------|---------|--------|------|-----------------|------|------|------|
| <b><u>rs7913426</u></b>  | chr10 | Artemis | G      | 0.13 | 0.044           | 0.56 | 0.31 | 0.97 |
| rs7476111                | chr10 | Artemis | T      | 0.33 | 0.138           | 1.32 | 0.92 | 1.91 |
| rs584531                 | chr11 | MRE11   | C      | 0.39 | 0.058           | 0.70 | 0.48 | 1.01 |
| rs2508678                | chr11 | MRE11   | T      | 0.32 | 0.131           | 1.34 | 0.92 | 1.97 |
| <b><u>rs7117042</u></b>  | chr11 | MRE11   | T      | 0.05 | 0.002           | 3.00 | 1.51 | 6.28 |
| rs604845                 | chr11 | MRE11   | T      | 0.39 | 0.038           | 0.68 | 0.47 | 0.98 |
| rs533984                 | chr11 | MRE11   | A      | 0.34 | 0.092           | 1.37 | 0.95 | 1.98 |
| rs540199                 | chr11 | MRE11   | G      | 0.37 | 0.144           | 0.76 | 0.53 | 1.10 |
| <b><u>rs1801516</u></b>  | chr11 | ATM     | A      | 0.09 | 0.062           | 1.74 | 0.98 | 3.16 |
| rs373759                 | chr11 | ATM     | T      | 0.41 | 0.110           | 0.73 | 0.50 | 1.07 |
| rs540723                 | chr11 | CHEK1   | A      | 0.10 | 0.082           | 1.62 | 0.95 | 2.82 |
| <b><u>rs537046</u></b>   | chr11 | CHEK1   | G      | 0.16 | 0.075           | 0.64 | 0.39 | 1.04 |
| rs9514825                | chr13 | LIG4    | T      | 0.36 | 0.075           | 1.38 | 0.97 | 1.98 |
| rs4635191                | chr13 | LIG4    | G      | 0.25 | 0.107           | 1.37 | 0.94 | 2.01 |
| <b><u>rs1151402</u></b>  | chr13 | LIG4    | T      | 0.45 | 0.045           | 0.67 | 0.45 | 0.99 |
| rs2273175                | chr14 | XRCC3   | C      | 0.41 | 0.089           | 0.73 | 0.51 | 1.05 |
| rs2295148                | chr14 | XRCC3   | T      | 0.47 | 0.061           | 0.70 | 0.49 | 1.01 |
| <b><u>rs2295146</u></b>  | chr14 | XRCC3   | T      | 0.47 | 0.015           | 0.63 | 0.43 | 0.91 |
| rs8548                   | chr14 | XRCC3   | C      | 0.40 | 0.097           | 0.73 | 0.51 | 1.06 |
| rs3825550                | chr14 | XRCC3   | T      | 0.03 | 0.096           | 2.25 | 0.89 | 6.19 |
| rs828910                 | chr2  | Ku80    | G      | 0.46 | 0.108           | 1.35 | 0.94 | 1.96 |
| <b><u>rs828911</u></b>   | chr2  | Ku80    | A      | 0.41 | 0.093           | 1.37 | 0.95 | 1.98 |
| rs828701                 | chr2  | Ku80    | T      | 0.45 | 0.066           | 1.40 | 0.98 | 2.02 |
| rs2303400                | chr2  | Ku80    | C      | 0.46 | 0.113           | 0.74 | 0.50 | 1.07 |
| rs207908                 | chr2  | Ku80    | T      | 0.43 | 0.105           | 1.37 | 0.94 | 2.01 |
| rs5752776                | chr22 | CHEK2   | A      | 0.34 | 0.099           | 0.73 | 0.49 | 1.06 |
| rs9620817                | chr22 | CHEK2   | T      | 0.13 | 0.067           | 0.56 | 0.29 | 1.03 |
| <b><u>rs5762763</u></b>  | chr22 | CHEK2   | C      | 0.30 | 0.023           | 1.58 | 1.07 | 2.36 |
| rs2236141                | chr22 | CHEK2   | T      | 0.12 | 0.032           | 1.76 | 1.06 | 2.99 |
| rs6519265                | chr22 | Ku70    | A      | 0.20 | 0.114           | 1.39 | 0.93 | 2.12 |
| <b><u>rs132793</u></b>   | chr22 | Ku70    | A      | 0.20 | 0.091           | 1.43 | 0.95 | 2.17 |
| <b><u>rs10804682</u></b> | chr3  | ATR     | A      | 0.22 | 0.094           | 0.67 | 0.41 | 1.07 |
| <b><u>rs2244012</u></b>  | chr5  | RAD50   | G      | 0.18 | 0.135           | 1.43 | 0.90 | 2.29 |
| rs6596087                | chr5  | RAD50   | A      | 0.18 | 0.112           | 1.46 | 0.92 | 2.34 |
| rs6871536                | chr5  | RAD50   | C      | 0.18 | 0.138           | 1.42 | 0.90 | 2.27 |
| <b><u>rs3218400</u></b>  | chr7  | XRCC2   | T      | 0.12 | 0.123           | 0.62 | 0.33 | 1.13 |
| <b><u>rs7830743</u></b>  | chr8  | DNA-PKc | G      | 0.11 | 0.071           | 0.54 | 0.27 | 1.04 |
| rs4873737                | chr8  | DNA-PKc | G      | 0.12 | 0.080           | 0.57 | 0.30 | 1.06 |
| rs4873772                | chr8  | DNA-PKc | A      | 0.31 | 0.128           | 1.34 | 0.92 | 1.97 |
| <b><u>rs10091017</u></b> | chr8  | DNA-PKc | A      | 0.10 | 0.062           | 0.52 | 0.26 | 1.02 |
| <b><u>rs14448</u></b>    | chr8  | NBN     | G      | 0.06 | 0.064           | 1.91 | 0.98 | 3.87 |
| rs9995                   | chr8  | NBN     | G      | 0.36 | 0.102           | 0.73 | 0.49 | 1.06 |
| SB_rs1063054             | chr8  | NBN     | G      | 0.36 | 0.130           | 0.74 | 0.50 | 1.09 |
| SB_rs2735383             | chr8  | NBN     | G      | 0.36 | 0.141           | 0.75 | 0.51 | 1.10 |
| <b><u>rs6998169</u></b>  | chr8  | NBN     | A      | 0.13 | 0.014           | 0.45 | 0.23 | 0.84 |

\* The underlined SNPs were selected from each gene ( $p < 0.15$ ) to represent the allelic status for those genes.

† XRCC2 and XRCC4 were not listed in this table because of no SNPs showing association with methylation at  $p$  value less than 0.15.

**Supplemental Table 5.** Common haplotypes of the MRE11A gene.

| Haplotype<br>† | Tag SNPs* |   |   |          |   |   |   |   |   |    |    |    |    |    | Prevalence (%) |
|----------------|-----------|---|---|----------|---|---|---|---|---|----|----|----|----|----|----------------|
|                | 1         | 2 | 3 | 4        | 5 | 6 | 7 | 8 | 9 | 10 | 11 | 12 | 13 | 14 |                |
| Hap1           | C         | C | C | C        | T | T | G | A | G | T  | T  | A  | G  | T  | 33.8           |
| Hap2           | T         | T | G | C        | C | C | T | G | A | C  | C  | G  | C  | C  | 21.7           |
| Hap3           | T         | C | C | C        | C | T | G | A | G | T  | T  | A  | G  | T  | 21.2           |
| Hap4           | T         | T | C | <b>T</b> | C | T | G | A | A | C  | C  | A  | C  | C  | 7.5            |
| Hap5           | T         | C | C | C        | C | C | G | G | G | C  | C  | G  | C  | C  | 6.0            |

\* SNP1 to SNP14 correspond to rs584531, rs2508678, rs1271079, rs7117042, rs604845, rs654718, rs529126, rs641936, rs533984, rs1270146, rs659349, rs540199, rs2509943, and rs610899. These SNPs are sorted by their position on chromosome 11. The bolded **T** allele identifies the risk haplotype associated with high methylation index.

† Haplotypes were generated by HaploView.
